# Supplementary material
Source: publisher site journal article supplement (https://www.dovepress.com/article/581820)
Supplement: Supplementary file 1 [file 581820%20Supplementary%20material.docx]

**Supplementary Figure 1**


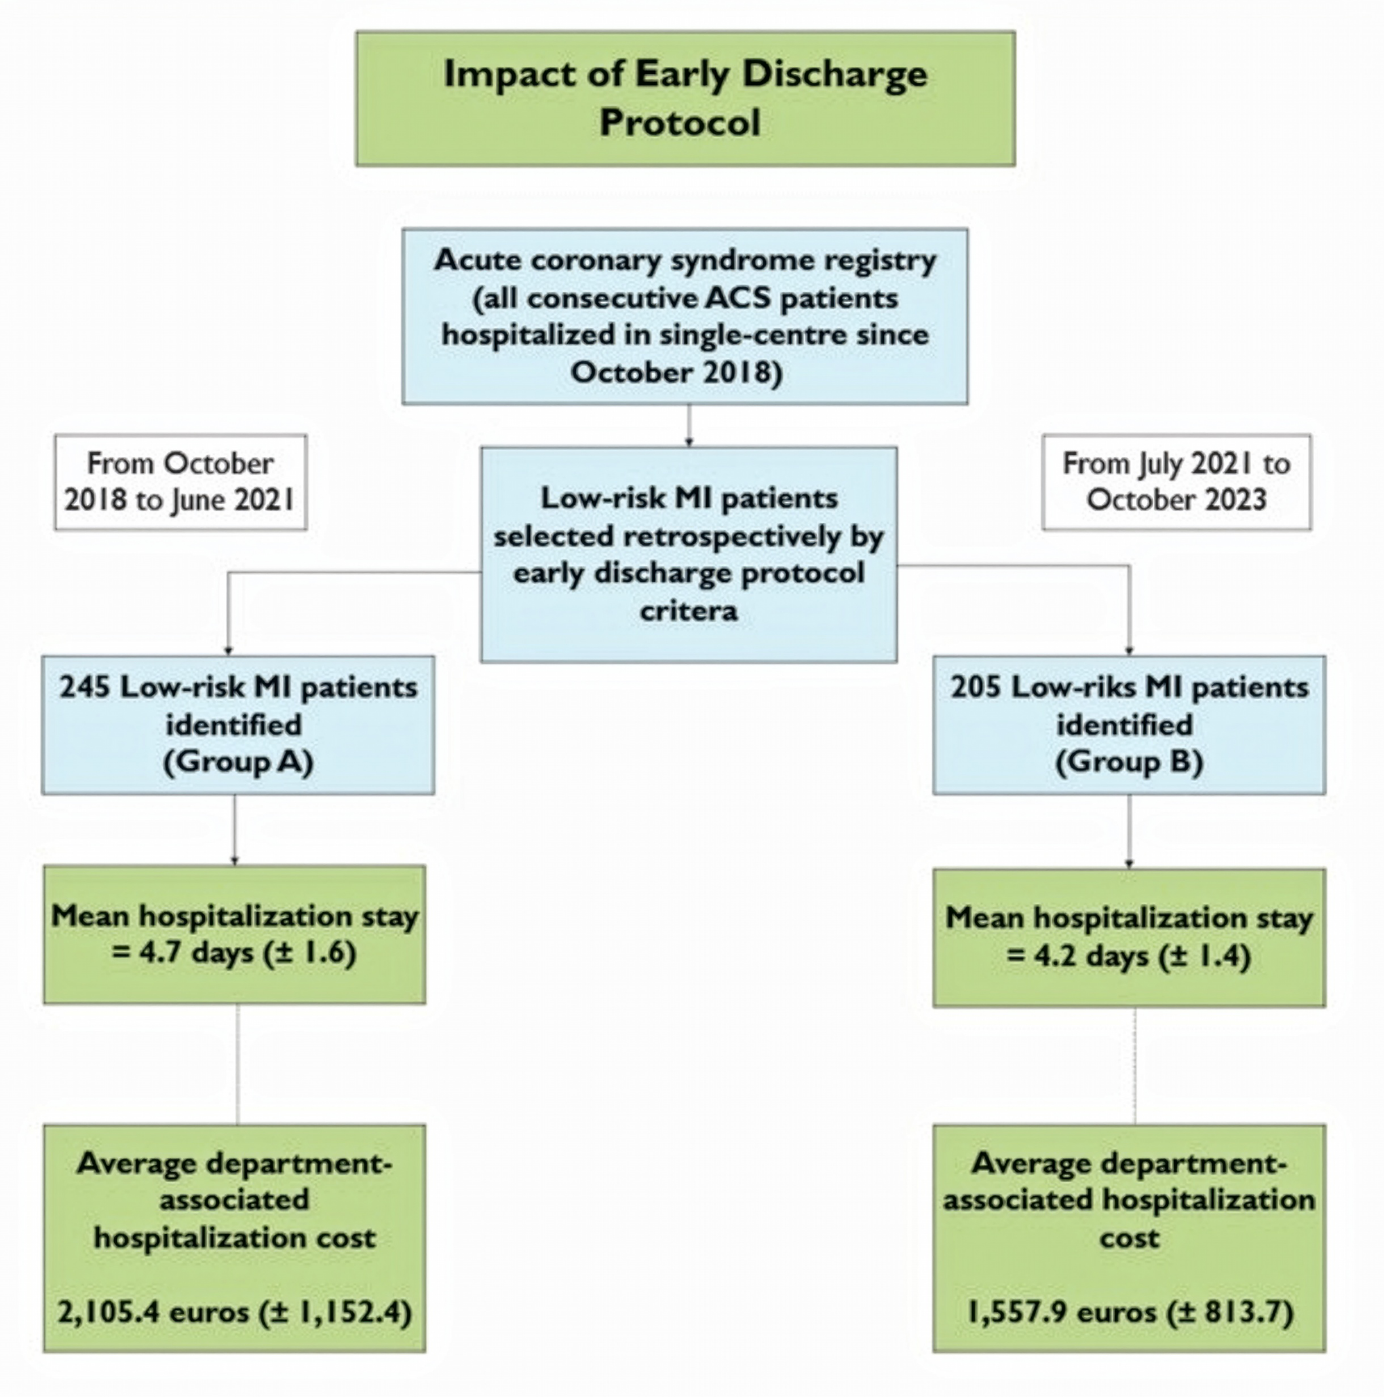


**Supplementary Figure 1.** A flowchart of retrospective analysis of all low-risk MI patients prior to (Group A) and after (Group B) the early discharge protocol implementation

**Supplemental Figure 2**


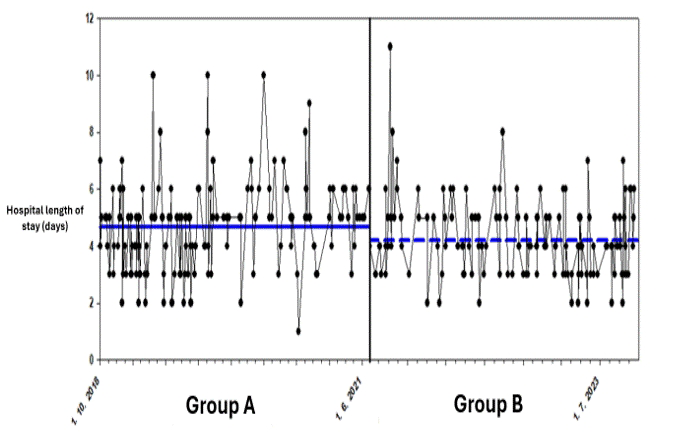


**Supplemental Figure 2.** Total hospital length of stay of all low-risk MI patients prior to (Group A) and after (Group B) EDP implementation, with a detailed view of the observation period

**Supplemental Figure 3**

**
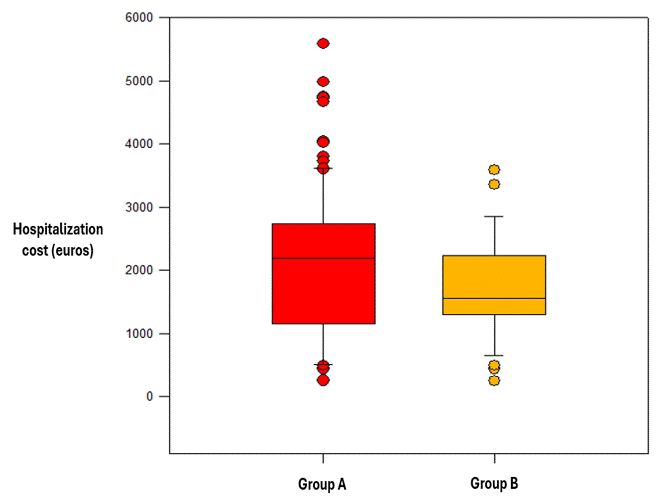
**

**Supplemental Figure 3 .** Department-associated hospitalization costs prior to (Group A) and after (Group B) EDP implementation
